# Supplementary material
Source: Springer Nature journal article supplement (https://www.springermedizin.de/resource/supplementary/12947_2008_238_MOESM1_ESM.pdf/9556524)

2/P.9

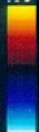

.69

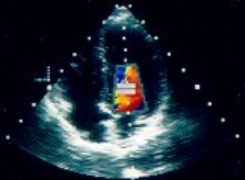

H3.5 MHz 160mm  
CARDIAC-DIFF  
GENERAL

1:0 100%

CA<sub>1</sub> = .50m/s

2.0MHz

1.0

m/s

0

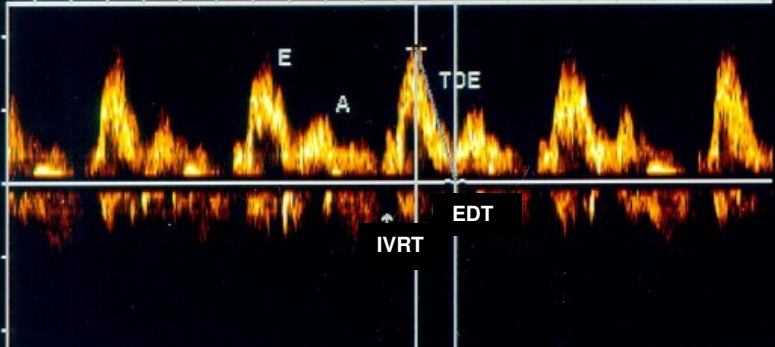

E

A

IVRT

TDE

EDT

Supplement: MOESM1 [file 9556524]
